# Supplementary material for: Chlorophyll a Synthesis in Rhodobacter sphaeroides by Chlorophyll Synthase of Nicotiana tabacum
Source: MDPI journal article supplement (doi:10.3390/biology12040573), 2023-04-10
Supplement: s1 [file s1]

**Table S1. Bacterial strains.**

| Strains                     | Relevant characteristics                                                                                                                                                   | Source or reference |
|-----------------------------|----------------------------------------------------------------------------------------------------------------------------------------------------------------------------|---------------------|
| <i>R. sphaeroides</i>       |                                                                                                                                                                            |                     |
| <i>R. sphaeroides</i> 2.4.1 | Type strain                                                                                                                                                                | [1]                 |
| BG1                         | Sm <sup>r</sup> /Sp <sup>r</sup> ; $\Delta bchG$ mutant; gene interruption in <i>bchG</i> by Sm <sup>r</sup> /Sp <sup>r</sup> cassette                                     | [2]                 |
| BF                          | $\Delta bchF$ mutant; internal deletion in <i>bchF</i> by pLOtp- $\Delta bchF$ [3]                                                                                         | This study          |
| BZF1                        | Km <sup>r</sup> ; $\Delta bchZ \Delta bchF$ mutant; internal deletion in <i>bchF</i> and interruption in <i>bchZ</i> by Km <sup>r</sup> cassette                           | [3]                 |
| BP                          | $\Delta bchP$ mutant; internal deletion                                                                                                                                    | This study          |
| BFP                         | $\Delta bchF \Delta bchP$ mutant; internal deletion in <i>bchF</i> and <i>bchP</i>                                                                                         | This study          |
| BZFP                        | Km <sup>r</sup> ; $\Delta bchZ \Delta bchF \Delta bchP$ mutant; internal deletion in <i>bchF</i> and <i>bchP</i> , interruption in <i>bchZ</i> by Km <sup>r</sup> cassette | This study          |
| BZFP-WSCP-Ntc               | Km <sup>r</sup> Tc <sup>r</sup> ; BZFP + pRK-WSCP-Ntc                                                                                                                      | This study          |
| BG1-415                     | Sm <sup>r</sup> /Sp <sup>r</sup> , Tc <sup>r</sup> ; BG1 + pRK415                                                                                                          | This study          |
| BG1-Atc                     | Sm <sup>r</sup> /Sp <sup>r</sup> , Tc <sup>r</sup> ; BG1 + pRK-Atc                                                                                                         | This study          |
| BG1-Ntc                     | Sm <sup>r</sup> /Sp <sup>r</sup> , Tc <sup>r</sup> ; BG1 + pRK-Ntc                                                                                                         | This study          |
| BG1-Asc                     | Sm <sup>r</sup> /Sp <sup>r</sup> , Tc <sup>r</sup> ; BG1 + pRK-Asc                                                                                                         | This study          |
| BG1-Osc                     | Sm <sup>r</sup> /Sp <sup>r</sup> , Tc <sup>r</sup> ; BG1 + pRK-Osc                                                                                                         | This study          |
| BG1-Rsb                     | Sm <sup>r</sup> /Sp <sup>r</sup> , Tc <sup>r</sup> ; BG1 + pRK-Rsb                                                                                                         | This study          |
| BG1-Syc                     | Sm <sup>r</sup> /Sp <sup>r</sup> , Tc <sup>r</sup> ; BG1 + pRK-Syc                                                                                                         | This study          |
| BG1-Psc                     | Sm <sup>r</sup> /Sp <sup>r</sup> , Tc <sup>r</sup> ; BG1 + pRK-Psc                                                                                                         | This study          |
| BG1-Smc                     | Sm <sup>r</sup> /Sp <sup>r</sup> , Tc <sup>r</sup> ; BG1 + pRK-Smc                                                                                                         | This study          |
| BG1-Ppc                     | Sm <sup>r</sup> /Sp <sup>r</sup> , Tc <sup>r</sup> ; BG1 + pRK-Ppc                                                                                                         | This study          |
| BG1-Apc                     | Sm <sup>r</sup> /Sp <sup>r</sup> , Tc <sup>r</sup> ; BG1 + pRK-Apc                                                                                                         | This study          |
| BG1-Bpc                     | Sm <sup>r</sup> /Sp <sup>r</sup> , Tc <sup>r</sup> ; BG1 + pRK-Bpc                                                                                                         | This study          |
| BG1-Ccc                     | Sm <sup>r</sup> /Sp <sup>r</sup> , Tc <sup>r</sup> ; BG1 + pRK-Ccc                                                                                                         | This study          |
| BG1-Cmc                     | Sm <sup>r</sup> /Sp <sup>r</sup> , Tc <sup>r</sup> ; BG1 + pRK-Cmc                                                                                                         | This study          |
| BG1-Avb                     | Sm <sup>r</sup> /Sp <sup>r</sup> , Tc <sup>r</sup> ; BG1 + pRK-Avb                                                                                                         | This study          |
| BG1-Cab                     | Sm <sup>r</sup> /Sp <sup>r</sup> , Tc <sup>r</sup> ; BG1 + pRK-Cab                                                                                                         | This study          |
| BG1-Ctb                     | Sm <sup>r</sup> /Sp <sup>r</sup> , Tc <sup>r</sup> ; BG1 + pRK-Ctb                                                                                                         | This study          |
| BG1-Ctc                     | Sm <sup>r</sup> /Sp <sup>r</sup> , Tc <sup>r</sup> ; BG1 + pRK-Ctc                                                                                                         | This study          |
| BG1-Rdb                     | Sm <sup>r</sup> /Sp <sup>r</sup> , Tc <sup>r</sup> ; BG1 + pRK-Rdb                                                                                                         | This study          |
| BG1-Pmc                     | Sm <sup>r</sup> /Sp <sup>r</sup> , Tc <sup>r</sup> ; BG1 + pRK-Pmc                                                                                                         | This study          |
| WT-415                      | Tc <sup>r</sup> ; WT + pRK415                                                                                                                                              | This study          |
| WT-Syc                      | Tc <sup>r</sup> ; WT + pRK-Syc                                                                                                                                             | This study          |
| WT-Ntc                      | Tc <sup>r</sup> ; WT + pRK-Ntc                                                                                                                                             | This study          |
| WT-Pmc                      | Tc <sup>r</sup> ; WT + pRK-Pmc                                                                                                                                             | This study          |
| BZF1-415                    | Km <sup>r</sup> , Tc <sup>r</sup> ; BZF1 + pRK415                                                                                                                          | This study          |
| BZF1-Atc                    | Km <sup>r</sup> , Tc <sup>r</sup> ; BZF1 + pRK-Atc                                                                                                                         | This study          |
| BZF1-Ntc                    | Km <sup>r</sup> , Tc <sup>r</sup> ; BZF1 + pRK-Ntc                                                                                                                         | This study          |
| BZF1-Asc                    | Km <sup>r</sup> , Tc <sup>r</sup> ; BZF1 + pRK-Asc                                                                                                                         | This study          |
| BZF1-Osc                    | Km <sup>r</sup> , Tc <sup>r</sup> ; BZF1 + pRK-Osc                                                                                                                         | This study          |
| BZF1-Rsb                    | Km <sup>r</sup> , Tc <sup>r</sup> ; BZF1 + pRK-Rsb                                                                                                                         | This study          |
| BZF1-Syc                    | Km <sup>r</sup> , Tc <sup>r</sup> ; BZF1 + pRK-Syc                                                                                                                         | This study          |
| BZF1-Psc                    | Km <sup>r</sup> , Tc <sup>r</sup> ; BZF1 + pRK-Psc                                                                                                                         | This study          |
| BZF1-Smc                    | Km <sup>r</sup> , Tc <sup>r</sup> ; BZF1 + pRK-Smc                                                                                                                         | This study          |
| BZF1-Ppc                    | Km <sup>r</sup> , Tc <sup>r</sup> ; BZF1 + pRK-Ppc                                                                                                                         | This study          |
| BZF1-Apc                    | Km <sup>r</sup> , Tc <sup>r</sup> ; BZF1 + pRK-Apc                                                                                                                         | This study          |
| BZF1-Bpc                    | Km <sup>r</sup> , Tc <sup>r</sup> ; BZF1 + pRK-Bpc                                                                                                                         | This study          |
| BZF1-Ccc                    | Km <sup>r</sup> , Tc <sup>r</sup> ; BZF1 + pRK-Ccc                                                                                                                         | This study          |
| BZF1-Cmc                    | Km <sup>r</sup> , Tc <sup>r</sup> ; BZF1 + pRK-Cmc                                                                                                                         | This study          |
| BZF1-Avb                    | Km <sup>r</sup> , Tc <sup>r</sup> ; BZF1 + pRK-Avb                                                                                                                         | This study          |
| BZF1-Cab                    | Km <sup>r</sup> , Tc <sup>r</sup> ; BZF1 + pRK-Cab                                                                                                                         | This study          |
| BZF1-Ctb                    | Km <sup>r</sup> , Tc <sup>r</sup> ; BZF1 + pRK-Ctb                                                                                                                         | This study          |
| BZF1-Ctc                    | Km <sup>r</sup> , Tc <sup>r</sup> ; BZF1 + pRK-Ctc                                                                                                                         | This study          |
| BZF1-Rdb                    | Km <sup>r</sup> , Tc <sup>r</sup> ; BZF1 + pRK-Rdb                                                                                                                         | This study          |
| BZF1-Pmc                    | Km <sup>r</sup> , Tc <sup>r</sup> ; BZF1 + pRK-Pmc                                                                                                                         | This study          |
| <i>E. coli</i>              |                                                                                                                                                                            |                     |
| DH5 $\alpha$ <i>phe</i>     | <i>supE44</i> $\Delta lacU169$ ( $\Phi 80 lacZ \Delta M15$ ) <i>hsdR17 recA1 endA1 gyrA96 thi-1 relA1 phe::Tn10dCm</i>                                                     | [4]                 |
| S17-1                       | C600::RP-4 2-(Tc::Mu)(Km::Tn7) <i>thi pro hsdR hsdM+ recA</i>                                                                                                              | [5]                 |
| BL21 (DE3)                  | <i>E. coli</i> B F- <i>dcm ompT hsdS(rB- mB-)</i> gal $\lambda$ (DE3)                                                                                                      | Stratagene          |

**Table S2. Primers.**

| Primers | Nucleotide sequence (from 5' end to 3' end) | Note                           |
|---------|---------------------------------------------|--------------------------------|
| P1F     | <u>GCATGCCGCTGATCGGCCAGATGC</u>             | <i>Sph</i> I is underlined.    |
| P1R     | <u>GAATTCACGATCTGGCTGTCGGG</u>              | <i>EcoR</i> I is underlined.   |
| P2F     | <u>GAATTCGTTCTCCGCTCGATGCAG</u>             | <i>EcoR</i> I is underlined.   |
| P2R     | <u>TCTAGAACGCGGTCGGCGAAGACG</u>             | <i>Xba</i> I is underlined.    |
| P3F     | <u>GGTCTCGAATGGCGGCGATAGAGGAC</u>           | <i>Bsa</i> I is underlined.    |
| P3R     | <u>GGTCTCAGCGCTGACGAAGATAACCAGAAGCTTC</u>   | <i>Bsa</i> I is underlined.    |
| P4F     | <u>GGTACCCACGCCCTGAATGTGGGC</u>             | <i>Kpn</i> I is underlined.    |
| P4R     | <u>TCTAGAGTCGGCCTGCACGCGGGC</u>             | <i>Xba</i> I is underlined.    |
| P5F     | <u>GGTACCCACGCCCTGAATGTGGGC</u>             | <i>Bam</i> HI is underlined.   |
| P5R     | AAAGAATTC <u>TCACGGCAGCACCTCCAGCCC</u>      | <i>Eco</i> RI is underlined.   |
| P6F     | AAAGGATCCGAAC <u>TTTCTCTCAATTC</u>          | <i>Bam</i> HI is underlined.   |
| P6R     | AAAGAATTC <u>TCAAATCCCCGCATGGCC</u>         | <i>Eco</i> RI is underlined.   |
| P7F     | <u>TTTCATATGAGTGTCAATCTATCC</u>             | <i>Nde</i> I is underlined.    |
| P7R     | <u>TTTAAGCTTCGGCAGCACCTCCAGCCC</u>          | <i>Hind</i> III is underlined. |
| P8F     | <u>TTTCATATGTCTGACACACAAAATACC</u>          | <i>Nde</i> I is underlined.    |
| P8R     | <u>TTTAAGCTTAATCCCCGCATGGCCTAG</u>          | <i>Hind</i> III is underlined. |
| P9F     | <u>CATATGACCAGCATTCTGAAC</u>                | <i>Nde</i> I is underlined.    |
| P9R     | <u>AAGCTTGTGTTGCGATGCTAATGC</u>             | <i>Hind</i> III is underlined. |
| P10F    | <u>CATATGGCGAGCCTGCTGAAC</u>                | <i>Nde</i> I is underlined.    |
| P10R    | <u>AAGCTTATGGGATGTTGCCAGCGC</u>             | <i>Hind</i> III is underlined. |
| P11F    | <u>CATATGGCGACCAGCCATCCG</u>                | <i>Nde</i> I is underlined.    |
| P11R    | <u>AAGCTTATGGCTAGTCGCCAGTGC</u>             | <i>Hind</i> III is underlined. |
| P12F    | <u>CATATGGCGACCAGCCATCTG</u>                | <i>Nde</i> I is underlined.    |
| P12R    | <u>AAGCTTATGACTGGTAGCTAATGC</u>             | <i>Hind</i> III is underlined. |

**Table S3. Plasmids.**

| Plasmids      | Relevant characteristics                                                                                                 | Source of reference |
|---------------|--------------------------------------------------------------------------------------------------------------------------|---------------------|
| pLO1          | Km <sup>r</sup> ; <i>sacB</i> <sup>+</sup> , RP4 <i>oriT</i> , ColE1 <i>ori</i> ; suicide vector for mutant construction | [6]                 |
| pRK415        | Tc <sup>r</sup> ; <i>ori</i> IncP Mob RP4 <i>lacZ</i> $\alpha$ ; expression vector for <i>R. sphaeroides</i>             | [7]                 |
| pASK-IBA3plus | Ap <sup>r</sup> ; inducible expression vector for strep-tagged protein in <i>E. coli</i>                                 | IBA Life sciences   |
| pET29a        | Km <sup>r</sup> ; inducible expression vector for His <sub>6</sub> -tagged protein in <i>E. coli</i>                     | Novagen             |
| pLO-bchP      | pLO1 + 1,046-bp <i>SphI/XbaI</i> fragment containing internally deleted <i>bchP</i> gene                                 | This study          |
| pChlase       | pASK-IBA3plus + 972-bp <i>BsaI</i> fragment containing <i>A. thaliana</i> chlorophyllase gene                            | This study          |
| pRK-WSCP-Ntc  | pRK415 + 2,337-bp <i>KpnI/EcoRI</i> fragment containing WSCP gene and <i>N. tabacum chlG</i>                             | This study          |
| pRK-Rsb       | pRK415 + 1,042-bp <i>BamHI/EcoRI</i> fragment containing <i>R. sphaeroides bchG</i>                                      | This study          |
| pRK-Syc       | pRK415 + 1,118-bp <i>BamHI/EcoRI</i> fragment containing <i>Synechocystis chlG</i>                                       | This study          |
| pRK-Atc       | pRK415 + 1,184-bp <i>XbaI/EcoRI</i> fragment containing <i>A. thaliana chlG</i>                                          | This study          |
| pRK-Ntc       | pRK415 + 1,142-bp <i>XbaI/EcoRI</i> fragment containing <i>N. tabacum chlG</i>                                           | This study          |
| pRK-Asc       | pRK415 + 1,157-bp <i>XbaI/EcoRI</i> fragment containing <i>A. sativa chlG</i>                                            | This study          |
| pRK-Osc       | pRK415 + 1,151-bp <i>XbaI/EcoRI</i> fragment containing <i>O. sativa chlG</i>                                            | This study          |
| pRK-Psc       | pRK415 + 1,187-bp <i>XbaI/EcoRI</i> fragment containing <i>P. sitchensis chlG</i>                                        | This study          |
| pRK-Smc       | pRK415 + 1,193-bp <i>XbaI/EcoRI</i> fragment containing <i>S. moellendorffii chlG</i>                                    | This study          |
| pRK-Ppc       | pRK415 + 1,811-bp <i>XbaI/EcoRI</i> fragment containing <i>P. patens chlG</i>                                            | This study          |
| pRK-Apc       | pRK415 + 1,232-bp <i>XbaI/EcoRI</i> fragment containing <i>A. protothecoides chlG</i>                                    | This study          |
| pRK-Bpc       | pRK415 + 1,295-bp <i>XbaI/EcoRI</i> fragment containing <i>B. prasinos chlG</i>                                          | This study          |
| pRK-Ccc       | pRK415 + 1,049-bp <i>XbaI/EcoRI</i> fragment containing <i>C. crispus chlG</i>                                           | This study          |
| pRK-Cmc       | pRK415 + 1,232-bp <i>XbaI/EcoRI</i> fragment containing <i>C. merolae chlG</i>                                           | This study          |
| pRK-Avb       | pRK415 + 935-bp <i>XbaI/EcoRI</i> fragment containing <i>A. vinosum bchG</i>                                             | This study          |
| pRK-Cab       | pRK415 + 953-bp <i>XbaI/EcoRI</i> fragment containing <i>C. aurantiacus bchG</i>                                         | This study          |
| pRK-Ctb       | pRK415 + 1,013-bp <i>XbaI/EcoRI</i> fragment containing <i>C. tepidum bchG</i>                                           | This study          |
| pRK-Ctc       | pRK415 + 1,124-bp <i>XbaI/EcoRI</i> fragment containing <i>C. tepidum chlG</i>                                           | This study          |
| pRK-Rdb       | pRK415 + 920-bp <i>XbaI/EcoRI</i> fragment containing <i>R. denitrificans bchG</i>                                       | This study          |
| pRK-Pmc       | pRK415 + 971-bp <i>XbaI/EcoRI</i> fragment containing <i>P. marinus chlG</i>                                             | This study          |
| pET-Rsb       | pET29a + 906-bp <i>NdeI/HindIII</i> fragment containing <i>R. sphaeroides bchG</i>                                       | This study          |
| pET-Syc       | pET29a + 972-bp <i>NdeI/HindIII</i> fragment containing <i>Synechocystis</i> sp. PCC6803 <i>chlG</i>                     | This study          |
| pET-Atc       | pET29a + 1,161-bp <i>NdeI/HindIII</i> fragment containing <i>A. thaliana chlG</i>                                        | This study          |
| pET-Ntc       | pET29a + 1,119-bp <i>NdeI/HindIII</i> fragment containing <i>N. tabacum chlG</i>                                         | This study          |
| pET-Ntc2      | pET29a + 1,119-bp <i>NdeI/HindIII</i> fragment containing <i>N. tabacum chlG2</i>                                        | This study          |
| pET-Asc       | pET29a + 1,134-bp <i>NdeI/HindIII</i> fragment containing <i>A. sativa chlG</i>                                          | This study          |
| pET-Osc       | pET29a + 1,128-bp <i>NdeI/HindIII</i> fragment containing <i>O. sativa chlG</i>                                          | This study          |

**Table S4. Kinetic parameters of NtChlG2.**

| First substrate <sup>a</sup> | Second substrate <sup>a</sup> | $K_m$<br>( $\mu\text{M}$ ) | $k_{\text{cat}}$<br>( $\text{min}^{-1}$ ) | $k_{\text{cat}} / K_m$<br>( $\text{mM}^{-1} \text{min}^{-1}$ ) |
|------------------------------|-------------------------------|----------------------------|-------------------------------------------|----------------------------------------------------------------|
| PPP                          | BChlide <i>a</i>              | 196 ± 31                   | 1.9 ± 0.3                                 | 10 ± 2                                                         |
|                              | Chlide <i>a</i>               | 23 ± 1                     | 8.7 ± 0.1                                 | 378 ± 4                                                        |

<sup>a</sup>*E. coli* lysate containing NtChlG2 was used as an enzyme source.

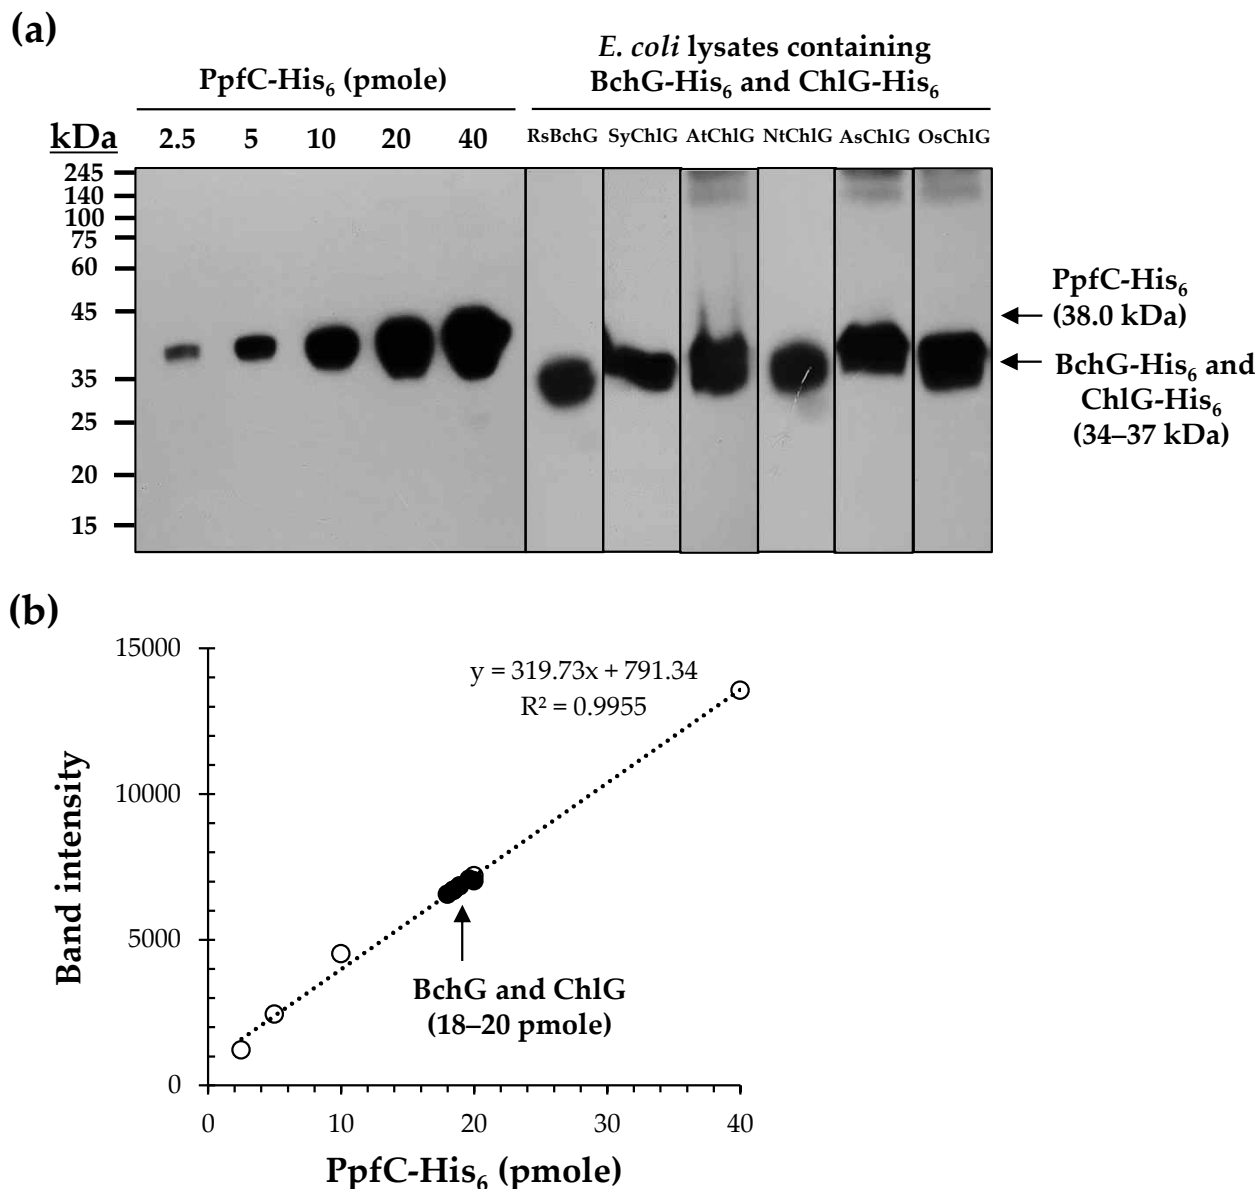

**Figure S1. Quantification of BchG and ChlG in *E. coli* lysate.**

BchG and ChlGs were fused to His<sub>6</sub>-tag at C-termini. BchG-His<sub>6</sub> and ChlG-His<sub>6</sub> in lysates of *E. coli* BL21 (DE3) were quantified by western immunoblot analysis using anti-His<sub>6</sub>-tag antibody. Cell lysates were loaded on SDS-polyacrylamide gel in parallel with varying amounts of PpfC-His<sub>6</sub> (38.0 kDa) as a quantification standard (a). The intensity of bands on expected size were measured by densitometer, and used to construct standard curve (b). The calculated amount of RsBchG, SyChlG, AtChlG, NtChlG, AsChlG, and OsChlG in cell lysates (0.2 mg protein) were 18.0, 19.6, 18.5, 18.4, 18.9, and 20.0 pmole, respectively.

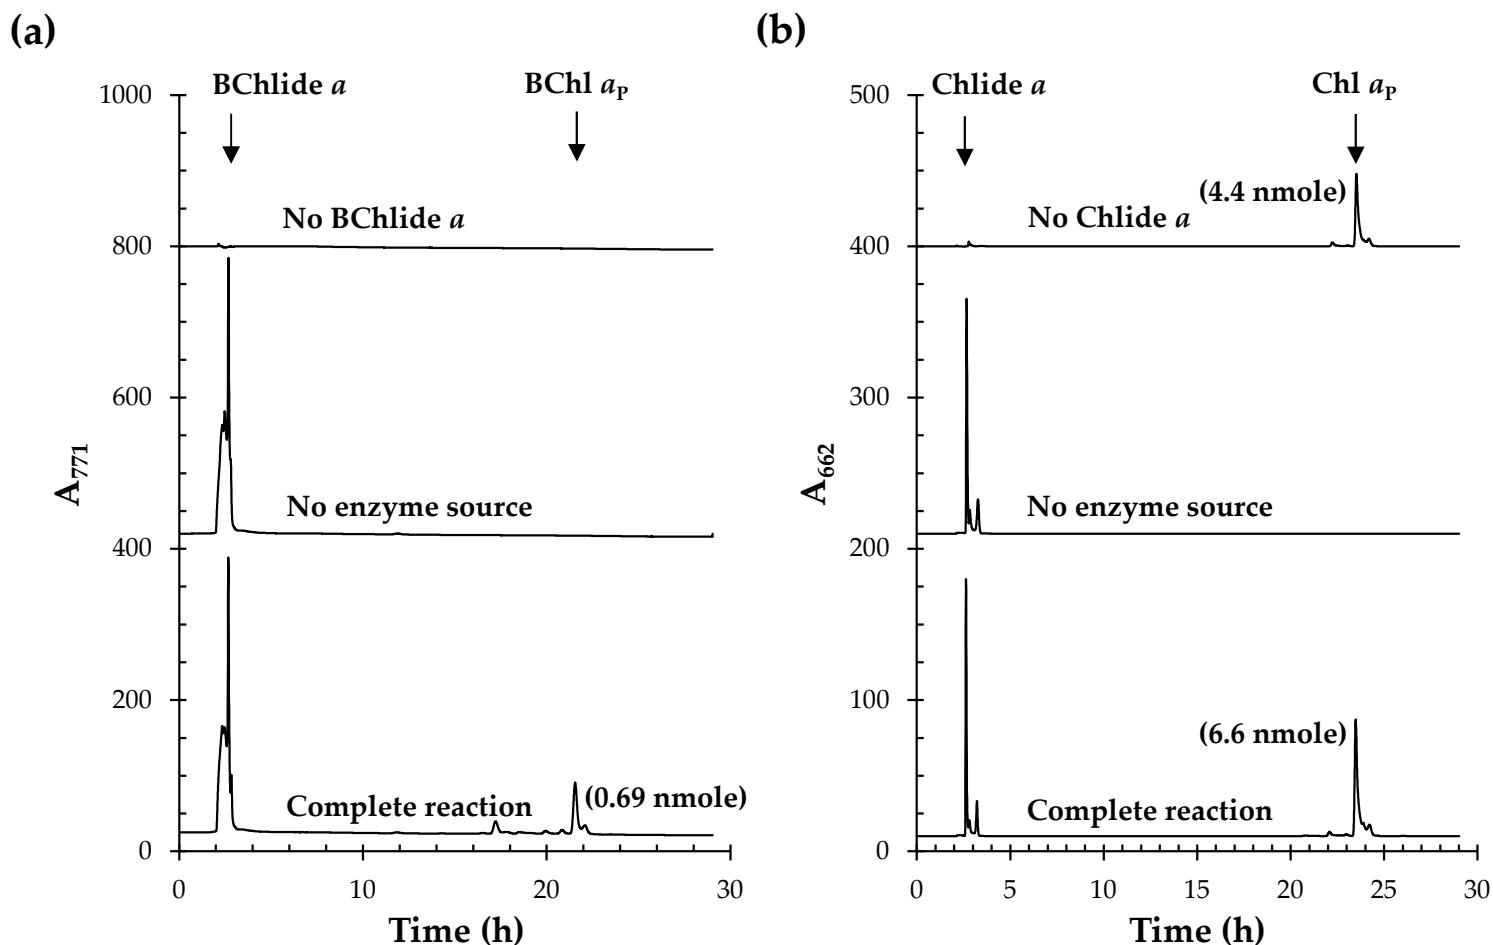

**Figure S2. ChlG and BchG activities in leaf lysates of *N. tabacum*.**

Light-incubated *N. tabacum* leaves (3-week-old) were lysed by sonication. Leaf lysates (1 mg protein) were used as enzyme sources for BchG (a) and ChlG reaction (b). PPP was used as the first substrate. BchG activity was confirmed by the formation of BChl  $a_p$  peak that is detected only in the presence of the second substrate BChlide  $a$  and leaf lysates (complete reaction). "No substrate" (no BChlide  $a$ ) (left top) and "No enzyme source" (no leaf lysates) (left middle) were included as controls. ChlG assay was performed similarly. Chl  $a_p$  was detected without addition of Chlide  $a$  exogenously, which was ascribed to the residual Chl  $a_p$  in the enzyme source (right top). Elevated formation of Chl  $a_p$  was observed when Chlide  $a$  was exogenously added to the reaction mixture, as expected (right bottom).

**Table S5.  $K_m$  of native ChlG from leaf lysates of *N. tabacum* for BChlide *a* and Chlide *a*.**

| Enzyme                   | First substrate | Second substrate | $K_m$ ( $\mu\text{M}$ ) |
|--------------------------|-----------------|------------------|-------------------------|
| Leaf lysate <sup>a</sup> | PPP             | BChlide <i>a</i> | 257 $\pm$ 31            |
|                          |                 | Chlide <i>a</i>  | 14 $\pm$ 1              |

<sup>a</sup>Light-incubated leaves of *N. tabacum* were used.

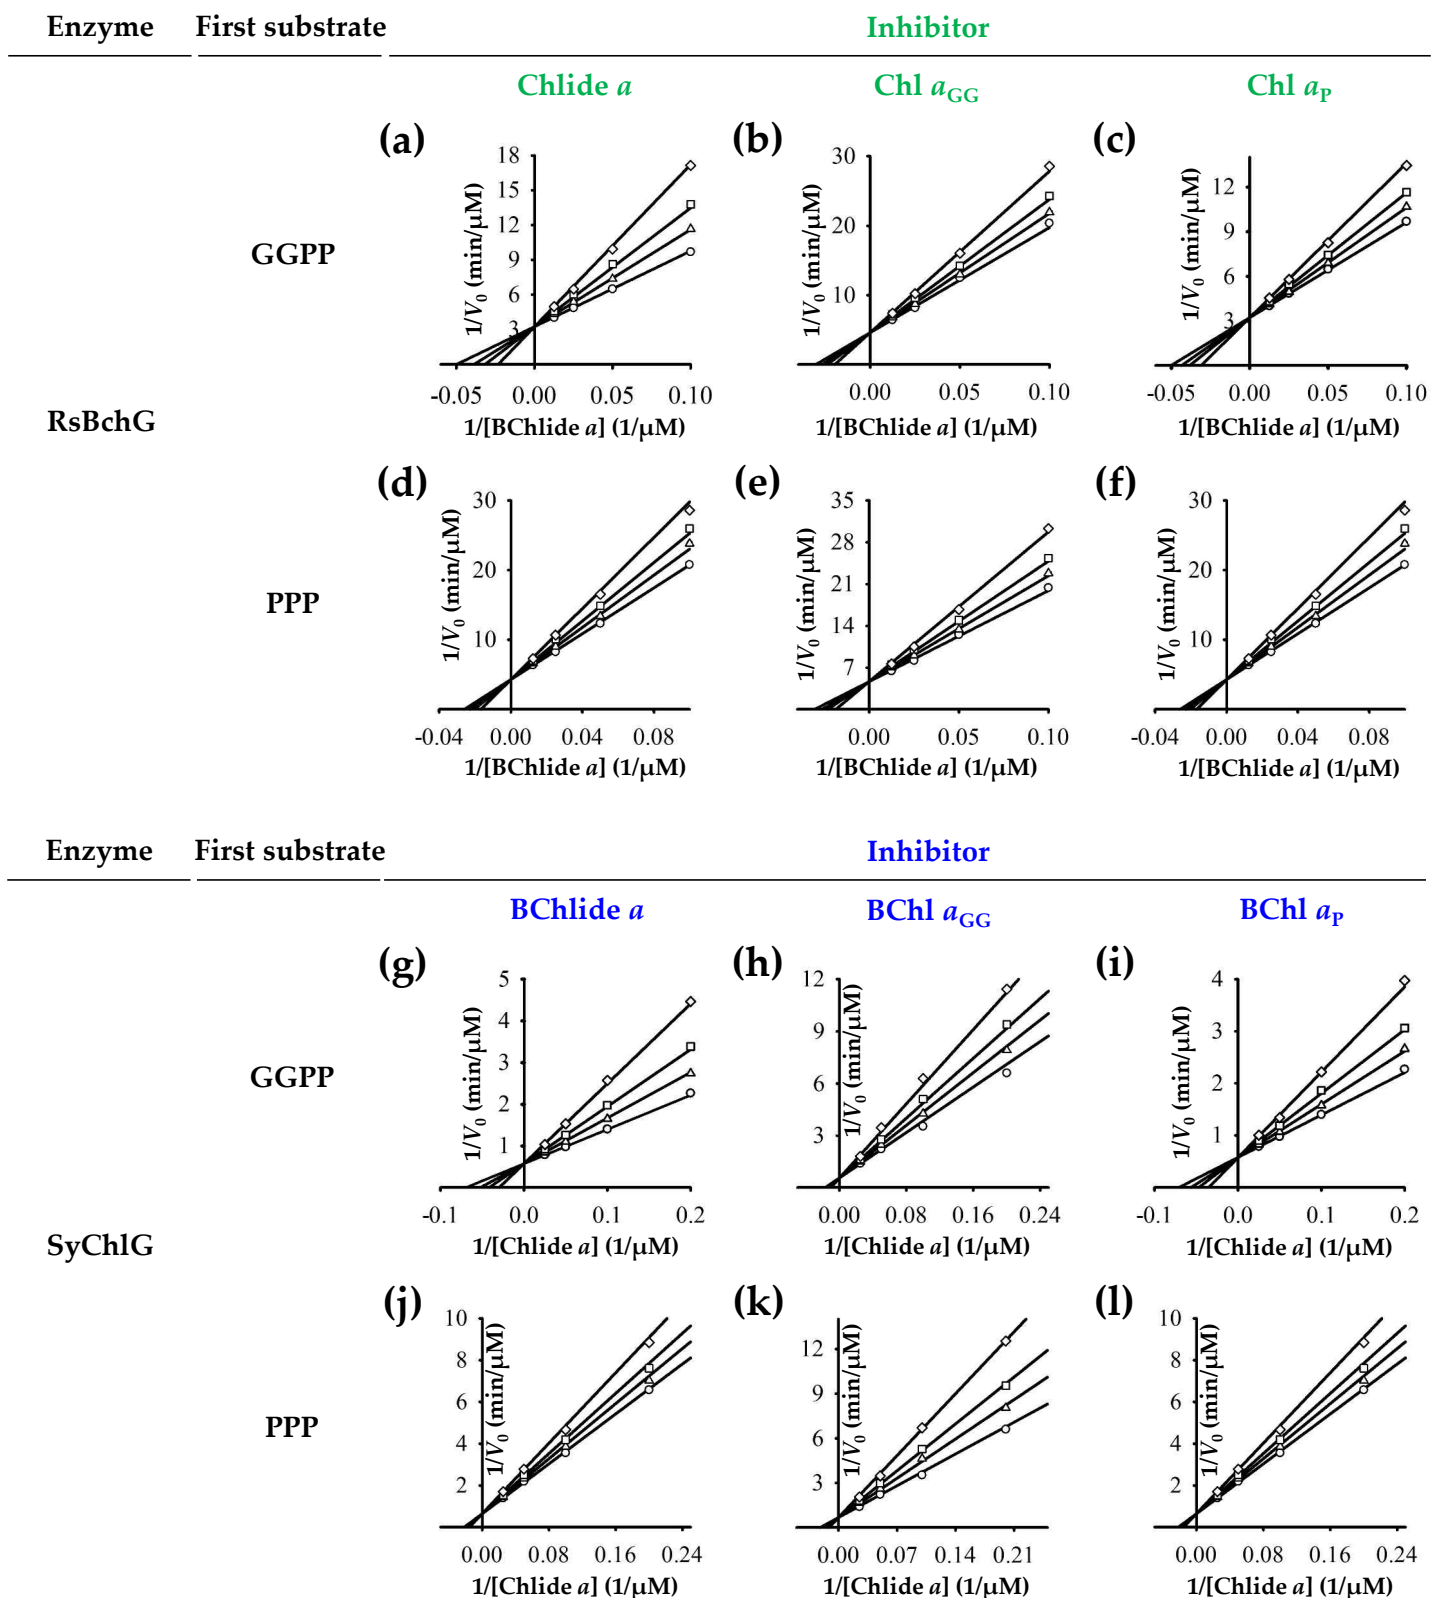

**Figure S3. Inhibition plots of RsBchG and SyChlG for chlorin and bacteriochlorin, respectively.**

Inhibition of RsBchG (a–f) by Chlide *a* (a and d), Chl *a*<sub>GG</sub> (b and e) and Chl *a*<sub>P</sub> (c and f), and that of SyChlG (g–l) by BChlide *a* (g and j), BChl *a*<sub>GG</sub> (h and k) and BChl *a*<sub>P</sub> (i and l) with GGPP (50 μM) (a–c and g–i) or PPP (50 μM) (d–f and j–l) were illustrated by double reciprocal plots of the second substrate (BChlide *a* or Chlide *a*) concentrations and initial velocities ( $V_0$ ). Inhibitors were used at 0 (circle), 10 (triangle), 20 (square) and 40 (diamond) μM. All datasets were fitted to competitive inhibition model by nonlinear regression. Computed inhibition constants were listed in Table 3.



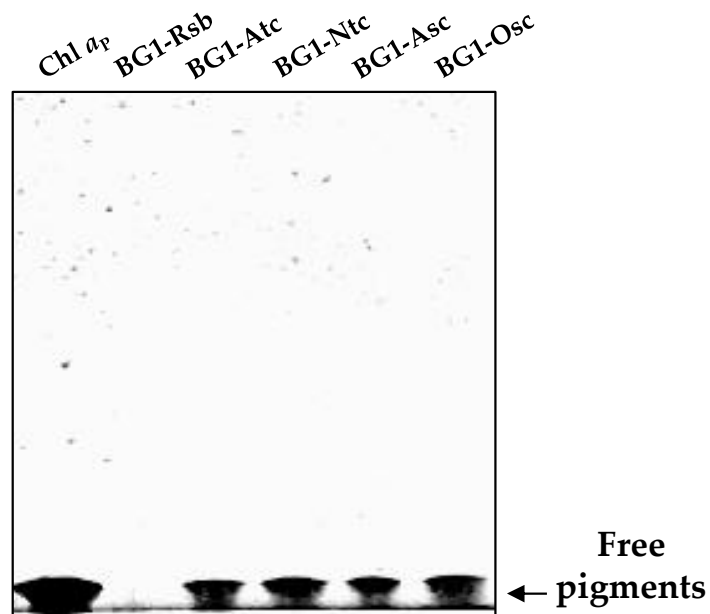

**Figure S4. Detection of free Chl  $a_p$  in the membranes of BG1 expressing angiosperm *chlGs*.** Membranes of BG1 expressing angiosperm *chlGs* were examined for free Chl  $a_p$  by CN-PAGE. Free pigments were detected by fluorescence emission under UV-A.

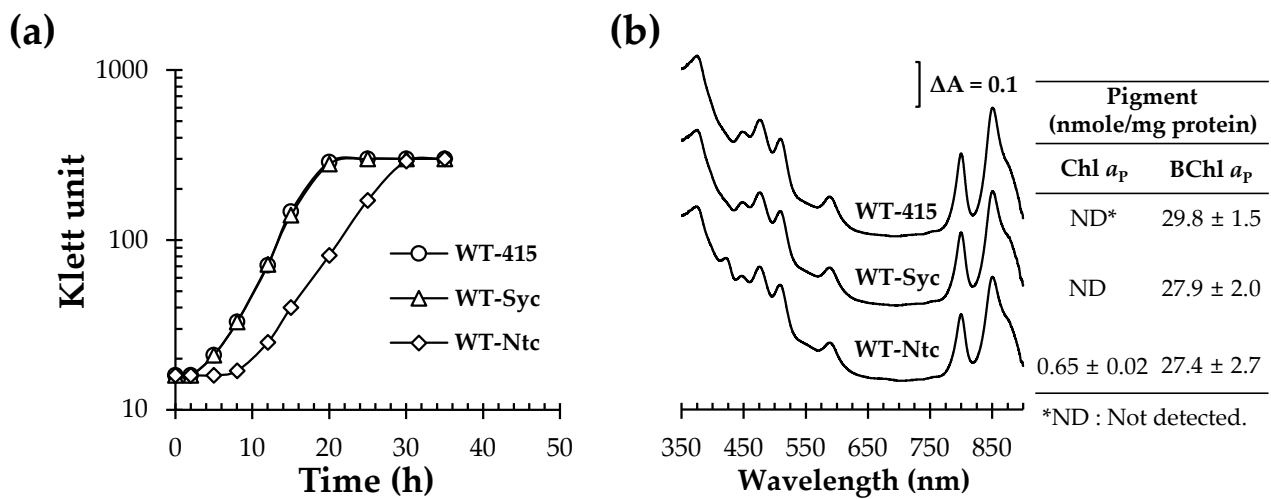

**Figure S5. Effect of *NtchlG* expression on the photoheterotrophic growth of WT.**

The photoheterotrophic growth (a) and membrane absorption spectrum (b) of WT-Ntc were recorded, in which WT-Syc and WT-415 were used as controls. Pigments were extracted from the membranes and quantified by HPLC, which are listed on the right side of corresponding spectra.

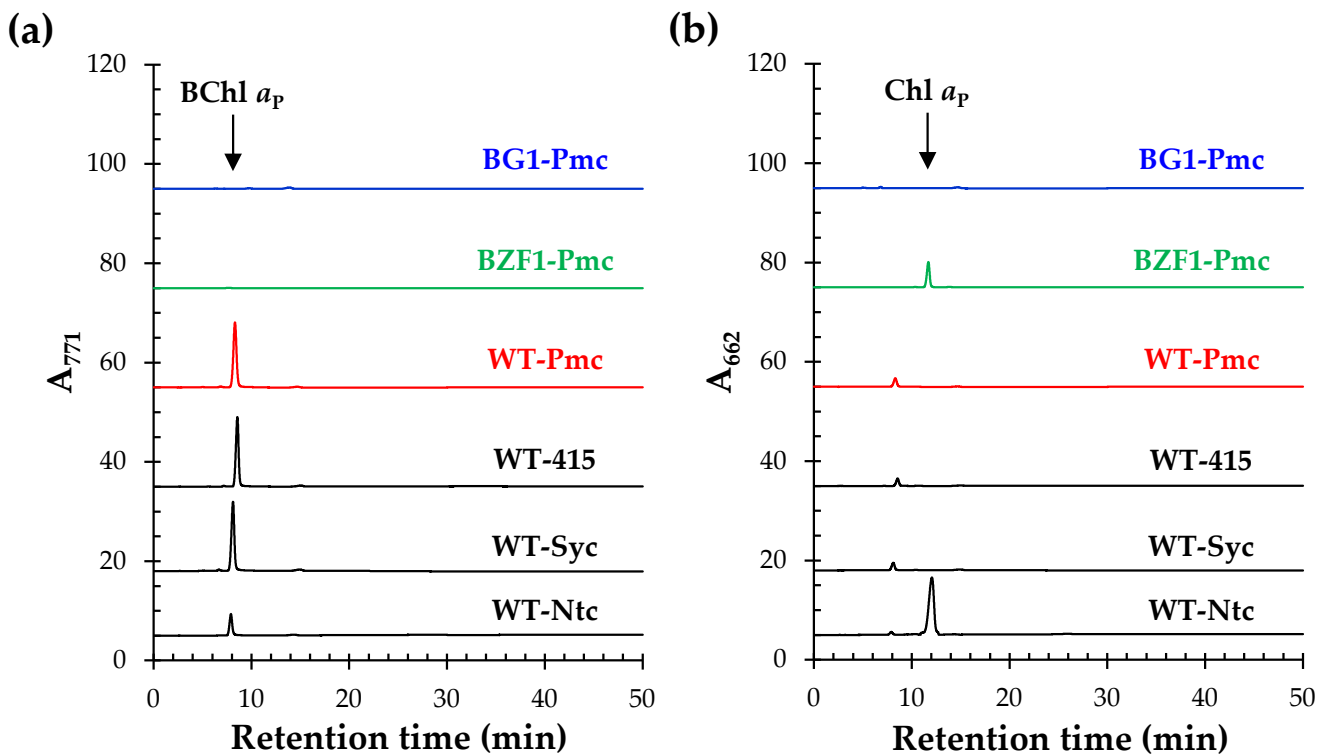

**Figure S6. Chl  $a_p$  formation by *Prochlorococcus marinus* ChlG in *R. sphaeroides*.**

BG1-Pmc and BZF1-Pmc (Table S1) were cultured anaerobically in the dark with 75 mM DMSO for 7 days. WT-Pmc (Table S1) was cultured in semi-aerobic condition for 12 h. WT-415, WT-Syc and WT-Ntc were also grown semi-aerobically and included as controls. Pigments were extracted from whole cells, and analyzed by HPLC to detect BChl  $a_p$  (a) and Chl  $a_p$  (b). No Chl  $a_p$  was formed in BG1-Pmc and WT-Pmc. It was only observed in BZF1 (b), in which metabolic path specific to BChl  $a_p$  formation was blocked.

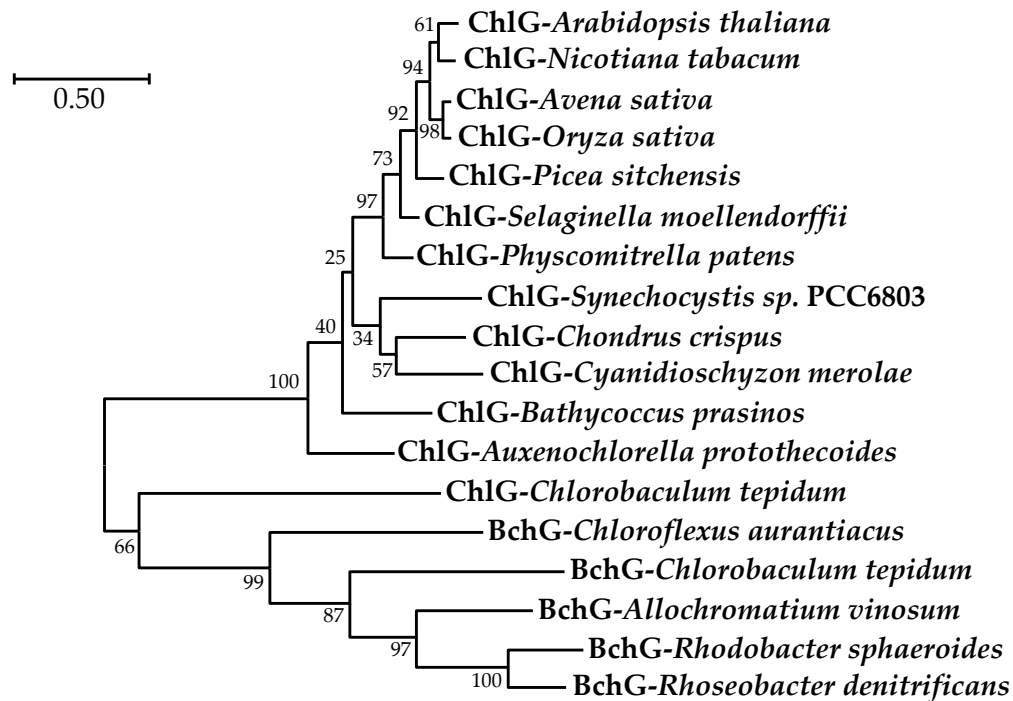

**Figure S7. Evolutionary analysis of BchGs and ChlGs.**

Evolutionary history was inferred by using the Maximum Likelihood method and Le-Gascuel 2008 model [8]. Tree with the highest log likelihood (-7501.06) is shown. The percentage of trees in which the associated taxa clustered together is shown next to the branches. Initial tree(s) for the heuristic search were obtained automatically by applying Neighbor-Join and BioNJ algorithms to a matrix of pairwise distances estimated using a JTT model, and then selecting the topology with superior log likelihood value. A discrete Gamma distribution was used to model evolutionary rate differences among sites (5 categories (+G, parameter = 0.9867)). The tree is drawn to scale, with branch lengths measured in the number of substitutions per site. This analysis involved amino acid sequence of 13 chlorophyll synthases and 5 bacteriochlorophyll synthases. All positions with less than 95% site coverage were eliminated, i.e., fewer than 5% alignment gaps, missing data, and ambiguous bases were allowed at any position (partial deletion option). There were a total of 287 positions in the final dataset. Evolutionary analyses were conducted in MEGA X [9].

# Amino Acid Sequences of BchG and ChlG

## 1. ChlG-*Arabidopsis thaliana*

MTSILNTVSTIHSRVTSVDRVGVLSLRNSDSVEFTRRRSGFSTLIYESPGRRFVVRAAETDSDKVKSQTPDKAPAGGSSINQLLGKIGASQETNKKWIRL  
QLTKPVTWPPLVWGVVCGAAASGNFHWTPEDVAKSILCMMMSGPCLTGYTQTINDWYDRDIDAINEPYRPIPSGAISEPEVITQVWVLLLGGLGIAG  
ILDVWAGHTTPTVFYALGGSLLSYIYSAPPLKQKQNGWVGNFALGASYISYIAGLGIAIVNDFKSVEGDRALGLQSLPVAFGTETAKWICVGAIDIT  
QLSVAGYLLASGKPYALALVALIIPQIVFQFKYFLKDPVKYDVKYQASAPFLVLGIFVTALASQH

## 2. ChlG-*Nicotiana tabacum*

MASLLNSVPSIKLSNFSNNNPLRSSQISSPFCLSLRRRLVVRATETDKEVKAQAPDKAPAAGGSSINQILGKIGAKQETDKWKIRVQLTKPVTWPPLV  
WGVVCGAAASGNFHWTPEDVAKSVCMMLMSGPFLTGYTQTINDWYDREIDAINEPYRPIPSGAISEQEVINQIWVLLLGGLGLAGILDVWAGHNFP  
TIFYALGGSLLSYIYSAPPLKQKQNGWIGNFALGASYISLPPWAGQALFGTLTPDIIVLTLTLYSVAGLGIAIVNDFKSIEGDRAMGLQSLPVAFGSEAA  
KWICVGAIDITQISVAGYLLGAGKPYALALLGLIAPQVFFQFKYFLKDPVKYDVKYQASAPFLILGLLVTALATSH

## 3. ChlG2-*Nicotiana tabacum*

MASLLNSVPSIKLSNFSNNNPLRSSQISSPFCLSFRRRLVVRATETDKEVKAQAPDKAPAAGGSSINQILGKIGAKQETDKWKIRVQLTKPVTWPPLV  
WGVVCGAAASGNFHWTPEDVAKSIVCMMLMSGPFLTGYTQTINDWYDREIDAINEPYRPIPSGAISGQEVINQIWVLLLGGLGLAGILDVWAGHDFPT  
IFYALGGSLLSYIYSAPPLKQKQNGWIGNFALGASYISLPPWAGQALFGTLTPDIIVLTLTLYSVAGLGIAIVNDFKSIEGDRAMRLQSLPVAFGSEAAK  
WICVGAIDITQISVAGYLLGAGKPYALALLGLIAPQVFFQFKYFLKDPVKYDVKYQASAPFLILGLLVTALATSH

## 4. ChlG-*Avena sativa*

MATSHPLAAAAATSSSSATFRPPLRFLSSPPSSLTLNRRRSFPVCAADADAKETTKKPTIPDKAPAAGSSFNQLLGKIGAKQETNIWKIRLQLTKPVT  
WPPLVWGVLCGAAASGNFHWTVEDVTKSIVCMMLMSGPCLTGYTQTINDWYDRDIDAINEPYRPIPSGAISENEVITQIWVLLLGGLGLGALLDIWAG  
HDFPIIFYALGGSLLSYIYSAPPLKQKQNGWIGNFALGASYIGLPWWAGQALFGTLTPDIVVLTCLYSIAGLGIAIVNDFKSIEGDRTLGLQSLPVAFG  
METAKWICVGAIDITQLSVAAYLLSTGKLYALALLGLTIPQVILQFQYFLKDPVKYDVKYQASAPFFVFLGLLVTALATSH

## 5. ChlG-*Oryza sativa*

MATSHLLAAASSTAASSATFRPPLSLRSPSSRLNRRRHQVVRAAETDKETKANAPEKAPAGGSSFNQLLGKIGAKQENDIWKIRLQLTKPVTW  
PPLVWGVLCGAAASGNFHWTVEDVAKSIVCMMSGPCLTGYTQTINDWYDRDIDAINEPYRPIPSGAISENEVITQIWALLLAGLGLGALLDVWAG  
HDFPIIFYLAVGGSLLSYIYSAPPLKQKQNGWIGNFALGASYIGLPWWAGQALFGTLTPDIVVLTSLYSIAGLGIAIVNDFKSVEGDRALGLQSLPVAFG  
METAKWICVGAIDITQLSVAGYLFSSGKPYALALLGLTIPQVVFQFQYFLKDPVKYDVKYQASAPFFVLGLLVTALATSH

## 6. ChlG-*Picea sitchensis*

MAALVHGISLTGFKNGSYSCTRSLFKGSYSGTPSLLLRLPTNPILSLHRRNIRVRAAETDNTQVESTSPEKAPAKNEGSSNLNQLLGKIGAAQETDKLKI  
RLQLTKPVTWAPLIWGVVCGAAASSGNFDWTVEDVTKAIACMVLSGPLLTGYTQTLNDWYDREIDAINEPYRPIPSGAISESEVITQIWVLLLGGLGLA  
ALLDVWAGHTVPSVFYIYAVGGSLLSYIYSAPPLKQKQNGWIGNFALGSSYICLPWWAGQALFGTLKPDIMVLTLYSIAGLGIAIINDFKSIEGDRAMG  
LQSLPVAFGVDTAKWICVGAIDITQLSIAGYLFATGKQYALALLGLITPQIILQFQYFLKDPKIDVKYQASAPFLVLGLLCTALATSH

## 7. ChlG-*Selaginella moellendorffii*

MAFLSLYLSKPSTTEALWVSDCRIIHGCCIQMPAARIRFQHRSAVRSKRHTGRLNVRAAGTETDKTKPNAPEVTPSDTRSSAVNQLLGMKGAGKET  
DKWKIRLQLTKPVTWAPLIWGVVCGAAASGNFHWTTIEDVAKSITCMLMAGPFLTGYTQTINDWYDREIDAINEPYRPIPSGAISEPEVITQIWVLLLG  
GIGLAYTLDVWAGHSFTIFCLSLGGALLSYIYSAPPLKQKQSGWIGNYALGSSYIALPWWASQALFGTLSDWVVLTLTLYSTAGLGIAIVNDFKSIEGD  
RAMGLQSLPVAFGIDTAKWICIGSIDLTQLSVAGYLFATGKLYALALLGLITPQIIFQFQYFLKDPKIDVKYQASAPFFVLGLLVTALATSH

# Amino Acid Sequences of BchG and ChlG

## 8. ChlG-*Physcomitrella patens*

MVAGGDSKYGSSLTTCeirfcncpGLSHSFDNGSGEFSITPLLRKILRRPCSHRGSNLGDFKPGRAPVTQLTLQLECVPRDRCDRTSSSHPNQVVGFR  
KTGSARTRILTNYAEHAASPARDYDKADKVSNTPGALRRALQGLSRAGRVPSSSSCRELGVQRSCGESERVVDAQLHGHAHFRSSCFTIPPAPLSRTP  
PFTMAMAVMASSAQATARLQLASSNPTKSSVRSLSASCASVAVRGFQPLSLQARGRLSRAGPLRIRAAAKDTEEDKVSCLVDAAPKAAGSAVNQLLGI  
KGASAETNKWKIRLQLTKPVTWAPLIWGVLCGAAASGNFQWTLLEDVAKSLTCMLMSGPLL TGYTQTINDWYDREIDAINEPYRPIPSGAISEPEVIA  
QIWILLGLGLGVAYGLDRWAGHDFPIILCTAIGGSFSLSYISAPPLKQKQSGWIGNYALGSSYISLPWWAGQALFGTSLWDVVILTLTYSTAGLGIAIVN  
DFKSIEGDRQMGLQSLPVAFGIDTAKYICAASIDVTQLAVAAYILYQKTYGLGLLALIIPQIILQFKYLLVDPVKYDVKYQASAPFFVFGLLLTALA  
TSH

## 9. ChlG-*Auxenochlorella protothecoides*

MPAPKISFVPGSRALNLRVSVHAKKEGKTTEAEVVPDAPPSKGSAAEDDPNRAFFLGVKGNAQMLGIRGAAVETDIWKIRLQLTKPVTWIPLIWG  
VICGAAASGNFEWTFRDCALSALCMLMSGPLL TGTQTMDYDREMDAINENRPIPSGAIEGDDVVAQIWILFFTSIAVAYTLQDASPSHDNLQLT  
GLALIGSFISFAYSVPWIKLRSGWIGNYALGSSYIALPWWAGQILFGQLRLDVAITMLYSIAGLGIAIVNDFKSIKGRVAGEDYVMLPPCNRQRAGA  
VWICDRELGLNSLPVAFGIEKAKWICAASIDVTQLGVAAYLAWGLNEPYAAGIAACLAPQVYAQVRYFLPDPVANDVKYQATAQPFLVIGLLVTA  
LAIGHQATPVALG

## 10. ChlG-*Bathycoccus prasinus*

MASILSVCTTTAAAMNAVVMNASRRSSSLFSSSSSSSSSSMRSSSFPGTSLKTSFKSSSKSIKMEQKRRRRRHDSGLIVTNMAAGDKVDDLNIKASETNV  
SETKLGSDVRQILGFKGASTEDVPVWKIHIQLTKPGTWVPLIWGVMCGAAASGHYEWNLNIGKALLCMTMSGPFLTGYTQTINDWYDREIDAINEN  
PYRPIPSGAISETAVKAQIAVLLGLLACGWQLDQWCEHDFPVIFLLTVFGSWVSYISAPPLKKAEGWKGCYALGSSYIALPWWAGMATFGQLTP  
DVMVLTVLYSIAGLGIAIVNDFKSIEGDRALGLQSLPVAFGVEKAKWITVGTIDATQLFVAFYLRGIGEDFYSNVLFCLIAPIQIFAQFKFPLDPIKNDVK  
YQAAAQPFLVFGLLATGLAWGHHVNMMLAA

## 11. ChlG-*Chondrus crispus*

MSGSGAPQPPTEADSPAVKGDSPANSSDVRQLLGIKASESTSKWRIRLQMLKPVTTWVPLIWGVTGCGAAASGNFHWNDPVDIEKSLACMFLAGP  
LLTGYTQVINDWYDREIDAINENRPIPSGAISETAVKAQIAVLLGLLACGWQLDQWCEHDFPVIFLLTVFGSWVSYISAPPLKKAEGWKGCYALGSSYIALP  
ALGASYISLPWWAGQALFGTLDWKTMLTLFYSFAGLGIAIINDFKSVEGDRATGMQSLPVMFGIDTAKWICVGMIDIFQLLVAGILFGVGEKGYAA  
AIVALVAPQMFLQKYLKDPVKYDVKYQASAPFFVIGILVAGLAVGHHGPL

## 12. ChlG-*Cyanidioschyzon merolae*

MVTPGFISSTVGARGMSSRSCKALALSRIPLVTWRRLNAAKHRGGLRLSQKADDQASPSESKQKSEQSGALDGKQTTGVNDSEQLRQLLGMGR  
GASKETNKWRIRLQMLKPVITWVWVCGGAAASGQYQWNPQDIAKLLLCMILSGPVLGFTQTLNDWFDREIDAVNEPYRPIPSGAISEGEVV  
AQIWALLFAGLGLAYGLDLWQGHQFPRVLAVALFGTFLAYISAPPLKKNKNGWLGNYALGASYISLPWWAGQSLFSDNPLDWKIIALTLLYSFAG  
LGIAVINDFKSIEGDRRLGLASLPVMYGVDTAKWL SVGLIDIFQALVAAYLALVGETGYALALVAMILPQVYLQWKIFLPDPMQNDVKYQGAAQPF  
LVFGILITALAIGHHGQL

## 13. ChlG-*Synechocystis* sp. PCC6803

MSDTQNTGQNQAKARQLLGMKGAAPGESSIWKIRLQMLKPVITWVWVCGAASSGGYIWSVEDFLKALTCMLLSGPLMTGYTQTLNDFYDRDI  
DAINEPYRPIPSGAISVPQVVTQILILLVAGIGVAYGLDVWAQHDFPIMMVLTLGGAFVAYISAPPLKKNKNGWLGNYALGASYIALPWWAGHALF  
GTLNPTIMVLTLLIYSLAGLGIAVVNDFKSVEGDRQLGLKSLPVMFGIGTAAWICVIMIDVFQAGIAGYLIYVHQQLYATIVLLLLIPQITFDQMYFLRNP  
LENDVKYQASAPFFVFGMLATGLALGHAGI

# Amino Acid Sequences of BchG and ChlG

## 14. BchG-*Rhodobacter sphaeroides*

MSVNLSLHPRSVPEPRALLELIQIPITWFPPIWAYLCGTVSVGIWPGEKWPLVLLGMVLAGPLVCGMSQAANNWCDRHVDAVNEPDRPIPSGRIPGR  
WGLYIALLMTVLSLAVGWMLGPWGFATVFGVLAAWAYSVEPIRLKRSGWWGPLVALCYEGLPWFTGAAVLSAGAPSFIVTVALLYAFGAHGI  
MTLNDFKALEGDRQHGVRSLPVMLGPEVA AKLACTVMAMAQILVITLLVIWGKPIHAGIITALLVAQLFAMRVLLRDPAGKCPWYNGTGVTLYVL  
GMMVAFAIRGLEVLVLP

## 15. BchG-*Allochromatium vinosum*

MNQTTVIATRTPYEPKALEVLHPITWFPMPWAFTCGVVSSGAPILEQWVLLIAGIILAGPLMCATSQVVNDWYDRDVAINEPDRPIPSGRIPGRWG  
FYLSLIWTVVSLALAYALGPWVFGMALIGMAISWGYSAAPPFRFKGNGWGNLAAGISYEGLAWVTGAAVMIGGALPGWEILVLALLYSLGAHGIM  
TLNDFKAIEGDIQMGVRSLPVQLGVEKAAWWACGVMGLPQAVVVALLFSWDKPAHAIAVGVLLIQVALMVRFLARPVERAVWFSGLGVTYVYT  
GMMISAFVRGLMTAAG

## 16. BchG-*Chloroflexus aurantiacus*

MSDMSDQTRLSSPPLPHKQPQSRYAWLVRSIQLMKPVTWFAPTWAFMCGAIASGALGWNESIGRLLLGMFMAGPILCGLSQVVNDYADREVD  
NEPHRLIPSGQVSLRHVYILTAVLTWIGASIALFLGRQVAFFVALGLVFALAYSLRPIRGKRNGWIGNALVAISYEGLAWMAGHAAPLTGESVTIA  
LLYSLGAHGIMTVNDFKSIRGDTIMGIRSIPVQYGVMAARMVVTMGVAQIAVIGLLFHWGHPVAATVVAILLAAQSIPNARFIRDPENNEVFFNA  
TAIMLYVWGMMLAAAIGLAA

## 17. BchG-*Chlorobaculum tepidum*

MNGSDTLNPELQLNIDEKHLQSGISQSRQKIIRQALENVNRPGFRIEPSAILPLMKPVTWFPMPWAFACGVVSTGESVTDNISILVRGVILAGPLMCAM  
SQTMDYDFDREVDINEPERPIPSGKISKQASWLITFGLILTGFVAVALSIHPYVMAIAFVGVLMASHAYS GPPIRAKRNGWFGNLIVGLAYEGVAWLTGS  
FAITQGVPSKESIALAIIFSLGAHGIMTLNDFKSVVGDKIRKVASIPVQLGEKNAAILASAVMDIAQIAAIAILVAKGSTIPTAIAVTLLIAQLPMQKILID  
HPAEKAVWYNAFGTLLYVLSMMVCAVGIRP

## 18. ChlG-*Chlorobaculum tepidum*

MALNAKRSVLPHEVLFLGFTCYFQALSFDQPNTSRVSNNSPDNIPFDTTQERASSGMSRRKPFVQGRRSFEPVSSLALFVRFLKPVTPWIPVVWSFICG  
AIASGAFGWQQIGEIKFWLAVLLTGPLATGTCQMLNDYFDRDLDEINEPNRPIPGGAIKLSATLLIALWSLLSVVVGWL VHPLIALYVVVGIINAHLY  
SANPIKLLKRLWAGNIIVAVSYLIPWVAGEIAYRDSFLHAITPSLIVATLYTIASTGTMTINDFKSIEGDRQVGIHTLPAIFGERKAALIAAILDLGQLM  
AAGYMFMIKAVYGVWVTAALVVPQFLQFSLVRSPTMDVRYNAIAQNFLVAGMMVCAFAIKSINP

## 19. BchG-*Rhoseobacter denitrificans*

MAVTDSIHTRRFPEPAAALRLIKPITWFPMPWAYLCGVVSSGVSPVGNWTLVLLGVVLAGPIVCGMSQAANDWCDRHVDAINEPHRPIPSGRIPGR  
WGLWIALAMSVLSLGVGWQLGPWGFATVVGVLAAWAYS AEPVRLKRSGWWGPLVGLSYETLPWFSTGAAVLSAGAPSLPVIVIAVLYGIGAHGI  
MTLNDFKALEGDRQMGVNSLPVTLGPQRAAQVACAVMSAPQVVVVFLFSWKGKPLHAAGVCAVLFVQFWAMTIMFKDPKAKAPWYNGTGVL  
YISGMMIAAFALRGLA

## 20. ChlG-*Prochlorococcus marinus*

MSDTRQLLGKGGSETTNIWKLRLQLMKPITWIPLLWGVICGAAASGNYHWNLSNFLASLACMVMSGPLLTGYTQTINDYDREIDAINESRPIPSG  
AISLTQVRIQIWLVLGLSFAAYGLDRWAGHSSPSVLYLALGGLSVSYIYSAPPLKQNGWLGNYALGASYIALPWWAGQALFGQLTWTALLTLA  
YSLAGLGIAVINDFKSVEGDKLGLQSLPVVFGIRNASFISAGMIDIFQLAMVGVLLILIGQHLASVILILLIIPQITFQDIWLLRDPLEFDVKYQASAPFLI  
LGMLVTALAIGHSSLINI

# Construction of Plasmids

## 1. Plasmid for in-frame *bchP* deletion

A 547-bp DNA upstream from the 60<sup>th</sup> codon and 499-bp DNA downstream from the 70<sup>th</sup> codon of *R. sphaeroides bchP* (RSP\_0277) were PCR-amplified using primer sets P1F/P1R and P2F/P2R, respectively (All the primers used in this study are listed in Table S2). The DNA fragment from P1F/P1R was digested with *SphI/EcoRI*, and the fragment from P2F/P2R was digested with *EcoRI/XbaI*. The resulting fragments were ligated into *SphI/XbaI* sites of pLO1 [6] to form pLO-bchP (Table S3).

## 2. Plasmids for purification of *A. thaliana* chlorophyllase

A gene fragment of chlorophyllase was PCR-amplified from total cDNA of *Arabidopsis thaliana* using primers P3F/P3R. The fragment was digested with *BsaI* and cloned into the *BsaI* site of pASK-IBA3plus (IBA Life sciences, Göttingen, Germany) to yield pChlase (Table S3).

## 3. Plasmid for expression of water-soluble chlorophyll-binding protein (WSCP) and NtChlG in *R. sphaeroides*

A 698-bp DNA fragment containing *puc* promoter region of *R. sphaeroides* [10] was PCR-amplified using primers P4F/P4R, followed by digestion with *KpnI/XbaI*. A 611-bp DNA fragment coding for WSCP of *Brassica oleracea* and ChlG of *Nicotiana tabacum* (*NtchlG*) were synthesized after optimization on the basis of codon bias of *E. coli* (Bioneer, Daejeon, Korea) as described previously [11]. The WSCP gene fragment was digested with *XbaI/PstI*, and *NtchlG* fragment of pRK-Ntc (Table S3) was digested with *PstI/EcoRI*. Three fragments of *puc* promoter, WSCP gene, and *NtchlG* were ligated together and cloned into the *KpnI/EcoRI* sites of pRK415 [7] to yield pRK-WSCP-Ntc (Table S3).

## 4. Plasmids for expression of *bchG* and *chlG* in *R. sphaeroides*

A DNA fragment coding for *bchG* (RSP\_0279) of *R. sphaeroides* extending from 133-bp upstream from start codon to its stop codon was PCR-amplified using primers P5F/P5R, followed by digestion with *BamHI/EcoRI*. The resulting DNA fragment was cloned into the *BamHI/EcoRI* site of pRK415 to yield pRK-Rsb (Table S3).

A DNA fragment coding for *chlG* (slr0056) of *Synechocystis* sp. PCC6803 extending from 143-bp upstream from start codon to its stop codon was PCR-amplified using primers P6F/P6R, followed by digestion with *BamHI/EcoRI*. The resulting DNA fragment was cloned into the *BamHI/EcoRI* site of pRK415 to yield pRK-Syc (Table S3).

A DNA fragment coding for *NtchlG* was synthesized after codon optimization for expression in *E. coli* (Bioneer, Daejeon, Korea). Ribosomal binding site (RBS; TTTAAGAAGGAGATATACAA) was put at the immediate upstream from start codon. The synthesized DNA fragment was digested with *XbaI/EcoRI* and cloned into *XbaI/EcoRI* sites of pRK415 to yield pRK-Ntc (Table S3). Likewise, genes coding for other chlorophyll synthases and bacteriochlorophyll synthases were also synthesized with the same RBS after codon optimization for expression in *E. coli*. The synthesized DNA fragments were digested with *XbaI/EcoRI* and cloned into *XbaI/EcoRI* sites of pRK415 to yield pRK-Atc (*A. thaliana chlG*), pRK-Asc (*Avena sativa chlG*), pRK-Osc (*Oryza sativa chlG*), pRK-Psc (*Picea sitchensis chlG*), pRK-Smc (*Selaginella moellendorffii chlG*), pRK-Ppc (*Physcomitrium patens chlG*), pRK-Apc (*Auxenochlorella protothecoides chlG*), pRK-Bpc (*Bathycoccus prasinos chlG*), pRK-Ccc (*Chondrus crispus chlG*), pRK-Cmc (*Cyanidioschyzon merolae chlG*), pRK-Avb (*Allochromatium vinosum bchG*), pRK-Cab (*Chloroflexus aurantiacus bchG*), pRK-Ctb (*Chlorobaculum tepidum bchG*), pRK-Ctc (*C. tepidum chlG*), pRK-Rdb (*Roseobacter denitrificans bchG*) and pRK-Pmc (*Prochlorococcus marinus chlG*) (Table S3). The amino acid sequences of the cloned ChlGs and BchGs were listed in supplementary materials.



# Construction of Plasmids

## 5. Plasmids for production of BchG and ChlGs in *E. coli*

A DNA fragment coding for *RsbchG* was PCR-amplified from pRK-Rsb using primers P7F/P7R. The resulting DNA was digested with *NdeI/HindIII* and cloned into the *NdeI/HindIII* site of pET29a (Novagen, Madison, WI, USA) to generate pET-Rsb (Table S3). Likewise, DNA fragments coding for other chlorophyll synthases were amplified from the corresponding recombinant pRK415 plasmids, digested with *NdeI/HindIII*, and cloned into the *NdeI/HindIII* site of pET29a to generate pET-Syc (amplified from pRK-Syc with primers P8F/P8R), pET-Atc (amplified from pRK-Atc with primers P9F/P9R), pET-Ntc (amplified from pRK-Ntc with primers P10F/P10R), pET-Asc (amplified from pRK-Asc with primers P11F/P11R), and pET-Osc (amplified from pRK-Osc with primers P12F/P12R) (Table S3). The gene for iso-enzyme of *N. tabacum* ChlG (*NtchlG2*) extending from start codon to its penultimate codon was synthesized after codon optimization for expression in *E. coli* with flanking enzyme sites of *NdeI/HindIII*. The resulting DNA fragment harboring *NtchlG2* was digested with *NdeI/HindIII* and cloned into pET29a to yield pET-Ntc2 (Table S3).

## Clear-Native PAGE

Clear-Native polyacrylamide (15%) gel electrophoresis (CN-PAGE) was performed as described previously [12] with some modifications. Membrane fraction was prepared from cells as described earlier in the main text. The membrane fraction was mixed with glycerol at 10% (w/v) prior to loading on polyacrylamide gel. Resolved gel was exposed to UV-A light for detection of free pigments.

## Kinetic Analysis of BchG and ChlG Activities in Leaf Extract of *N. tabacum*

ChlG and BchG activities were analyzed with leaf extracts of *N. tabacum*. In order to prevent contamination of any PS bacterium, *N. tabacum* seeds were briefly washed with 75% ethanol containing 0.05% Triton X-100 and dried, which were then planted into sterilized soil and cultivated under fluorescent light ( $100 \mu\text{E m}^{-2} \text{s}^{-1}$ ) at 23°C. Plants were grown for 3 weeks after germination in the same condition. Leaves were harvested and frozen in liquid  $\text{N}_2$ . Ice-chilled Reaction Buffer B (5 ml) was added to 1 g of frozen leaves, and they were immediately ground in precooled mortar, followed by sonication lysis on ice for 5 min for a total of three times. Supernatant (leaf lysate) was decanted after centrifugation at  $6,000 \times g$  for 10 min, which was used as an enzyme source for BchG and ChlG assays (1 mg protein for each reaction).

# References for Supplementary Materials

1. Siström, W.R. A Requirement for Sodium in the Growth of *Rhodospseudomonas sphaeroides*. *J. Gen. Microbiol.* **1960**, *22*, 778–785, doi:10.1099/00221287-22-3-778.
2. Kim, E.J.; Lee, J.K. Competitive inhibitions of the chlorophyll synthase of *Synechocystis* sp. strain PCC 6803 by bacteriochlorophyllide *a* and the bacteriochlorophyll synthase of *Rhodobacter sphaeroides* by chlorophyllide *a*. *J. Bacteriol.* **2010**, *192*, 198–207, doi:10.1128/JB.01271-09.
3. Kim, E.J.; Kim, J.S.; Lee, I.H.; Rhee, H.J.; Lee, J.K. Superoxide generation by chlorophyllide *a* reductase of *Rhodobacter sphaeroides*. *J. Biol. Chem.* **2008**, *283*, 3718–3730, doi:10.1074/jbc.M707774200.
4. Eraso, J.M.; Kaplan, S. *prpA*, a Putative Response Regulator Involved in Oxygen Regulation of Photosynthesis Gene Expression in *Rhodobacter sphaeroides*. *J. Bacteriol.* **1994**, *176*, 32–43, doi:10.1128/jb.176.1.32-43.1994.
5. Simon, R.; Priefer, U.; Pühler, A. A Broad Host Range Mobilization System for *In Vivo* Genetic Engineering: Transposon Mutagenesis in Gram Negative Bacteria. *Nat. Biotechnol.* **1983**, *1*, 784–791, doi:10.1038/nbt1183-784.
6. Lenz, O.; Schwartz, E.; Dornedde, J.; Eitinger, M.; Friedrich, B. The *Alcaligenes eutrophus* H16 *hoxX* Gene Participates in Hydrogenase Regulation. *J. Bacteriol.* **1994**, *176*, 4385–4393, doi:10.1128/jb.176.14.4385-4393.1994.
7. Keen, N.T.; Tamaki, S.; Kobayashi, D.; Troilinger, D. Improved broad-host-range plasmids for DNA cloning in Gram-negative bacteria. *Gene* **1988**, *70*, 191–197, doi:10.1016/0378-1119(88)90117-5.
8. Le, S.Q.; Gascuel, O. An improved general amino acid replacement matrix. *Mol. Biol. Evol.* **2008**, *25*, 1307–1320, doi:10.1093/molbev/msn067.
9. Kumar, S.; Stecher, G.; Li, M.; Niyaz, C.; Tamura, K. MEGA X: Molecular Evolutionary Genetics Analysis across Computing Platforms. *Mol. Biol. Evol.* **2018**, *35*, 1547–1549, doi:10.1093/molbev/msy096.
10. Lee, J.K.; Kaplan, S. Transcriptional Regulation of *puc* Operon Expression in *Rhodobacter sphaeroides*. *J. Biol. Chem.* **1995**, *270*, 20453–20458, doi:10.1074/jbc.270.35.20453.
11. Hitchcock, A.; Jackson, P.J.; Chidgey, J.W.; Dickman, M.J.; Hunter, C.N.; Canniffe, D.P. Biosynthesis of Chlorophyll *a* in a Purple Bacterial Phototroph and Assembly into a Plant Chlorophyll-Protein Complex. *ACS Synth. Biol.* **2016**, *5*, 948–954, doi:10.1021/acssynbio.6b00069.
12. Wittig, I.; Karas, M.; Schägger, H. High resolution clear native electrophoresis for in-gel functional assays and fluorescence studies of membrane protein complexes. *Mol. Cell. Proteomics* **2007**, *6*, 1215–1225, doi:10.1074/mcp.M700076-MCP200.
